1 **Title:**

2 The role of Zambia’s expansive Inter-agency Coordinating Committee (ICC) in supporting  
3 evidence-based vaccine and health sector programming

4 **Authors:**

5 Zoe Sakas<sup>1</sup>, Katie Rodriguez<sup>1</sup>, Kyra A Hester<sup>1</sup>, Roopa Darwar<sup>1</sup>, Bonheur Dounebaine<sup>1</sup>, Anna S  
6 Ellis<sup>1</sup>, Simone Rosenblum<sup>2</sup>, Kimberley R Isett<sup>3</sup>, Walter Orenstein<sup>4</sup>, Matthew C Freeman<sup>1</sup>,  
7 William Kilembe<sup>5</sup>, Robert A Bednarczyk<sup>1</sup>

8 **Affiliations:**

- 9 1. Rollins School of Public Health, Emory University, Atlanta, GA, USA
- 10 2. School of Public Policy, Georgia Institute of Technology, Atlanta, GA, USA
- 11 3. Biden School of Public Policy and Administration, Uni of Delaware, Newark, DE, USA
- 12 4. Emory School of Medicine, Emory University, Atlanta, GA, USA
- 13 5. Center for Family Health Research in Zambia, Lusaka, Zambia

14 **Correspondence to:**

15 Dr Robert A Bednarczyk

16 Hubert Department of Global Health, Rollins School of Public Health, Emory University

17 Atlanta, GA 30322, USA | Tel: 404-727-9713 | Email: [robert.a.bednarczyk@emory.edu](mailto:robert.a.bednarczyk@emory.edu)

18

19 **Abstract**

20 New vaccines, technologies, and regulations, alongside increased demand for vaccines, all  
21 require prioritization and coordination from key players within the vaccine sector. Inter-agency  
22 Coordinating Committees (ICC) support decision-making and coordination at the national-level  
23 and act as key drivers for sustainable improvements in vaccination programming. We employed  
24 a qualitative case study design to investigate critical success factors for the high routine  
25 immunization coverage in Zambia from 2000-2018. Qualitative data were collected between  
26 October 2019 and February 2020, including key informant interviews (n=66) at the national,  
27 provincial, district, and health facility levels. Thematic analysis was applied to understand the  
28 role of the Zambian ICC and its impact on the policy environment overtime. Throughout our  
29 study period, the Zambian ICC demonstrated the following improvements: 1) expanded  
30 membership to include diverse representation; 2) expanded scope and mandate to include  
31 maternal and child health in decision-making; and 3) collaboration with the ZITAG through  
32 distinct roles. The diverse and expansive membership of the Zambian ICC, along with its ability  
33 to foster government commitment and lobby for additional resources, supported improvements in  
34 immunization programming. The Zambian ICC holds considerable influence on government  
35 agencies and external partners which facilitates procurement of funding, policy decisions, and  
36 strategic planning.

37

38 **Keywords:** Vaccine, Zambia, Implementation Science, Health decision-making

39

40

41

42       **1. Introduction**

43 Immunization policies and programs in low and middle-income countries are constantly  
44 evolving.[1] The introduction of new vaccines, technologies, and regulations, alongside  
45 increased demand for vaccines, all require prioritization and coordination from key players  
46 within the vaccine sector.[1] To respond to growing needs, the establishment and maintenance of  
47 effective, efficient, and rigorous national-level coordination forums are essential.

48  
49 In the 1990s, the World Health Organization (WHO) established Inter-Agency Coordinating  
50 Committees (ICCs) as country-level forums to coordinate polio eradication programming.[2] In  
51 2006, Gavi, the Vaccine Alliance (Gavi) began using ICCs to support broader management of  
52 funds for immunization programming. [3,4] Gavi also requires creation of National  
53 Immunization Technical Advisory Groups (NITAG) to present data and evidence-based  
54 recommendations to the ICC and other national forums. [5,6,7] Since 2001, Gavi has contributed  
55 \$164,000,000 to the Zambian government for vaccination programming and health systems  
56 strengthening, which has supported the expansion and strengthening of Zambia’s ICC and  
57 NITAG, referred to as ZITAG. [7, 8]

58  
59 Literature suggests that ICCs and NITAGs should have distinct roles – the ICC supports  
60 supervision and coordination, and the NITAG provides technical expertise to promote rigorous  
61 decision-making [1,7]. However, relying on parallel administrative structures may foster  
62 confusion around roles and responsibilities, leading to inefficiencies and disruptions in program  
63 functioning [6,9,10]. Tailoring the roles and responsibilities of these unique forums to ensure  
64 they complement, rather than disrupt, each other may help overcome these challenges.

65

66 Successful coordination forums act as key drivers for sustainable improvements in vaccination  
67 programming and coverage [1,5,11]. This study illustrates how Zambia bolstered its ICC for  
68 long-term functionality, expanded ICC membership and scope beyond Gavi requirements, and  
69 distinguished a complementary structure for the Zambian Immunization Technical Advisory  
70 Group (ZITAG). In Zambia, stakeholders reported that this approach worked well to support  
71 immunization programming and improve vaccination coverage [11].

72

## 73 **2. Methods**

74 This study is nested within a larger research project which investigates key success factors for  
75 improvements in routine immunization coverage in Zambia, Nepal, and Senegal.

76

### 77 **Research questions:**

78 1. What were key drivers of success for high and sustained routine immunization coverage?

79 1.1. What were the key implementation and change management strategies employed  
80 for high growth in vaccine coverage levels?

81 2. How has the policy and decision-making environment changed over time, and how have  
82 these changes (or lack thereof) impacted both the functioning of the vaccination program  
83 and the environment in which it works?

84 2.1. How are country wide policy decisions made?

85 2.2. What is the interplay of the NITAG and ICC, and how does this top-down  
86 leadership impact decision-making?

87

88 This paper details one of the most influential success factors described by key informants – the  
89 role of the *Zambian ICC* – and its impact on the policy environment overtime.

90

## 91 **2.1 Study design and setting**

92 We employed a qualitative case study design to investigate factors that supported improvements  
93 in routine immunization coverage for children under 1 year of age in Zambia from 2000 to 2018.  
94 Zambia was one of three countries selected as exemplars in vaccine delivery [12]. Country  
95 selection for exemplars was determined by high and sustained DTP1 and DTP3 coverage  
96 (illustrated in Figures 1 and 2, respectively), which served as proxies of the vaccine delivery  
97 system. Lusaka, Central, and Luapula provinces were chosen based on vaccination coverage and  
98 contextual factors. Figure 3 illustrates routine immunization coverage improvements in different  
99 regions in Zambia to demonstrate heterogeneity between study sites [11]. Additional information  
100 about the site selection, sampling, and protocol can be found elsewhere [11,12].

101

102 *Figure 1. DTP1 coverage in Zambia 2000-2018*

103

104 *Figure 2. DTP3 coverage in Zambia 2000-2018*

105

106 *Figure 3. Heat map illustrating improved DTP3 coverage across all regions of Zambia 2000-2019*

107

## 108 **2.2 Data collection and analysis**

109 Qualitative data were collected between October 28, 2019 and March 6, 2020. Data collection  
110 included key informant interviews (n=66) at the national, provincial, district, and health facility  
111 levels. Data collection activities are summarized in Table 1. Data were collected by the Center

112 for Family Health Research in Zambia (CFHRZ). Key informant interview (KII) guides were  
 113 translated into Nyanja and Bemba languages by research assistants. Topics guides aimed to  
 114 identify key factors that drove the success of the vaccination program in Zambia, according to  
 115 key informants, especially during points of catalytic growth in DTP1 and DTP3 coverage. All  
 116 interview guides were piloted before use and adjusted iteratively throughout data collection.

117

118 *Table 1: Summary of research activities, October 2019 – February 2020*

| Method                   | Participants                          | Number of activities | Number of participants |
|--------------------------|---------------------------------------|----------------------|------------------------|
| Key Informant Interviews | Ministry of Health                    | 9                    | 10                     |
|                          | Ministry of Education                 | 1                    | 1                      |
|                          | Ministry of Finance                   | 1                    | 1                      |
|                          | Partner organization                  | 11                   | 15                     |
|                          | Provincial Health Office              | 6                    | 8                      |
|                          | District Health Offices               | 10                   | 19                     |
|                          | Nurses in-charge of health facilities | 7                    | 10                     |
|                          | Community-based volunteers            | 11                   | 11                     |
|                          | Community leaders                     | 10                   | 10                     |
| <b>Total</b>             |                                       | <b>66</b>            | <b>85</b>              |

119

120 An initial list of KIIs was developed with CFHRZ and MoH officials; we then used snowball  
 121 sampling to identify additional key informants. The duration of KIIs averaged one and a half  
 122 hours. KIIs were audio-recorded with the permission of participants. Research files, recordings,  
 123 and transcriptions were de-identified and password protected. Debriefs were conducted during  
 124 data collection to identify emerging themes and follow-up questions. All the topic guides used  
 125 for this study, as well as our analysis tools, can be found on our Open Sciences Framework  
 126 webpage [13].

127

128 We conducted a thematic analysis of the transcripts to identify contributing factors to the success  
129 of the immunization program. We developed a codebook using a deductive approach, applying  
130 constructs from existing implementation science frameworks, and adjusted the codebook based  
131 on the emerging themes. Transcripts were coded and analysed using MaxQDA2020 software  
132 (Berlin, Germany). All transcripts were coded, relevant themes were identified, and visual tools  
133 were used to illustrate the findings. We considered setting and participant roles while identifying  
134 key points, and further contextualized data using historical documents and a literature review.  
135 Further information about data management and analysis can be found elsewhere [11,12].

136

#### 137 **2.4 Gavi document review**

138 Following qualitative data analysis, we reviewed all Gavi annual reports for Zambia, including  
139 joint appraisals, that were publicly available within our study period [5]. During this document  
140 review, we focused on themes that emerged from the qualitative data. Findings from the  
141 qualitative data were triangulated with information from Gavi documents to strengthen the  
142 analysis.

143

#### 144 **2.5 Research advisory group and stakeholder feedback**

145 The findings were shared with a research advisory group composed of international and Zambian  
146 stakeholders and experts in the governance, policy, and immunization sectors. Follow-up  
147 questions were shared with in-country key informants to gain more information and detail.  
148 Details about advisory group members can be found elsewhere [12].

149

#### 150 **2.6 Ethics Statement**

151 The study was approved by the University of Zambia Biomedical Research Ethics Committee  
152 (Federal Assurance No. FWA00000338, REF. No. 166-2019), the National Health Research  
153 Authority in Zambia, and the Institutional Review Board committee of Emory University,  
154 Atlanta, Georgia, USA (IRB00111474). Informed consent was obtained from all 85 participants.  
155 Written consent forms were provided, reviewed, and signed prior to interviews. All consent  
156 forms were approved by the appropriate ethics committees.

157

158

### 159 **3. Key findings & Implications**

160 Many key informants, especially at the national and regional levels, identified the Zambian ICC  
161 as a key success factor for increasing vaccination coverage. Additionally, the Zambian ICC was  
162 described as a “*key driver of sustainable coverage and equity*” in the 2018 Gavi joint appraisal,  
163 which strengthens the findings from our qualitative data [5]. According to our analysis, the  
164 Zambian ICC has held considerable influence on government agencies and external partners,  
165 which facilitates the procurement of funding, policy decisions, and strategic planning.

166

167 *“For the EPI [Expanded Programme on Immunization], the Inter-Agency Coordinating*  
168 *Committee is a very important organ for policy development and resource*  
169 *mobilization.” (WHO personnel)*

170

171 The Zambian ICC was established in 1999 to meet WHO Polio Eradication Initiative  
172 requirements. The ICC was adapted in 2006 to support the management of Gavi funding for  
173 general immunization programming. The ICC continues to oversee vaccine initiatives, lobby for



174 funding from the national government and partners, and foster collaboration between the  
175 Ministry of Health (MoH), partners, and community-level stakeholders [5]. The key  
176 responsibility of the ICC is to facilitate decision-making and resource mobilization through  
177 monthly meetings.

178  
179 Throughout our study period, particularly from 2014 to present, the Zambian ICC has  
180 demonstrated the following improvements: 1) expanded membership to include diverse  
181 representation; 2) expanded scope and mandate to include maternal and child health in decision-  
182 making; and 3) collaboration with the ZITAG through distinct and complimentary roles and  
183 responsibilities. These factors are described further below.

184  
185 **3.1 The Zambian ICC expanded its membership and scope to improve reach,**  
186 **coordination, and commitment**

187 According to key informants and Gavi joint appraisals from 2014 to 2018, the Zambian ICC  
188 performed above the minimal requirements obligatory for funding [5]. The ICC sufficiently  
189 accomplished recommendations from Gavi related to strategic planning, financing, membership,  
190 information dissemination, and decision-making procedures which are outlined in joint appraisal  
191 reports [5]. These improvements were likely fuelled by recommendations from meetings in 2016  
192 and 2017 which included Gavi representatives, current ICC members, and key stakeholders from  
193 the Zambian government. The extent that the ICC improved from 2014 to 2018 suggests  
194 commitment and motivation from internal leadership and champions. Specifically, the Zambian  
195 ICC expanded both its membership and mandate to promote decision-making and resource  
196 allocation.

197

198 **3.1.1 Diverse and representative ICC membership**

199 The Zambian ICC includes diverse and representative membership to support collaboration  
200 among technical experts, decision-makers, and community organizations [7]. With its multi-  
201 sectoral composition, the ICC provides a forum for coordination of immunization investments,  
202 bolsters management of key action points, and administers technical working groups [15,16]. The  
203 MoH holds a leadership position and is considered a “*driving force*” of the forum’s success,  
204 according to national-level stakeholders. Additionally, over 50% of Zambia’s ICC members  
205 report having been members of the ICC for over 6 years, according to a recent Gavi evaluation  
206 [7]. Diversity and longevity of ICC members was described as beneficial to decision-making.

207

208 All members of the ICC are expected to share their opinions and vote on decisions to support  
209 collaboration between entities represented on the forum [5,15,16]. Additionally, members of the  
210 ICC may participate in other forums that contribute to development in Zambia, including  
211 meetings with the MoH to develop national health strategic plans and engagement with advisory  
212 committees for other health sectors [7]. This cross-membership supports efficiency of planning  
213 and resource allocation for health and development in Zambia through the alignment of ideas and  
214 priorities between decision-making bodies. Existing literature states that members of the ICC,  
215 ZITAG, and EPI Technical Working Groups are generally informed about decisions, plans, and  
216 evaluations in Zambia [7] – which aligns with our findings.

217

218 Table 2 outlines key ICC membership required or recommended by Gavi, and compares the  
219 fulfilment of these guidelines by the Zambian ICC in 2014 and 2018 [5]. Gavi support is reliant

220 on maintaining an active ICC, which includes at least one member in each of the required  
 221 categories:

- 222 1) Ministry of Health,
- 223 2) EPI Programming,
- 224 3) Financial Planning,
- 225 4) Health Systems Strengthening,
- 226 5) Key Donors, and
- 227 6) Implementing Partners.

228

229 Additionally, Gavi recommendations include ICC representation from the following:

- 230 7) Immunization Experts,
- 231 8) Technical Advisory Groups, and
- 232 9) Private Sector.

233

234 **Table 2: ICC membership matrix from 2014 and 2018\***

| Category                                                        | Member                                | 2014 | 2018 |
|-----------------------------------------------------------------|---------------------------------------|------|------|
| Ministry of Health<br><i>Required</i>                           | Minister of Health                    | X    | X    |
|                                                                 | Permanent Secretary                   |      | X    |
|                                                                 | Department of Child Health            |      | X    |
|                                                                 | Department of Epidemiology            |      | X    |
|                                                                 | Department of Planning                |      | X    |
|                                                                 | Department of Health Promotion        |      | X    |
|                                                                 | Statistical Office                    |      | X    |
| Expanded Programme<br>for Immunization (EPI)<br><i>Required</i> | EPI Manager                           |      | X    |
|                                                                 | EPI Officers: Cold chain, M&E         |      | X    |
|                                                                 | EPI district representatives          |      | X    |
| Financial Planning<br><i>Required</i>                           | UN Children’s Emergency Fund (UNICEF) | X    |      |
|                                                                 | World Health Organization             | X    | X    |

|                                       |                                                          |                                                          |   |
|---------------------------------------|----------------------------------------------------------|----------------------------------------------------------|---|
|                                       | Gavi, the Vaccine Alliance                               | X                                                        | X |
|                                       | Japan International Cooperation Agency                   | X                                                        |   |
|                                       | Zambian Department of Planning                           |                                                          | X |
|                                       | UN Development Programme                                 |                                                          | X |
| Health Systems Strengthening Required | Minister of Health                                       | X                                                        |   |
|                                       | Permanent Secretary                                      |                                                          | X |
|                                       | UN Development Programme                                 | X                                                        |   |
|                                       | World Health Organization                                | X                                                        | X |
|                                       | UN Children's Emergency Fund (UNICEF)                    |                                                          | X |
|                                       | UN Population Fund (UNFPA)                               |                                                          | X |
|                                       | US Centers for Disease Control and Prevention            |                                                          | X |
| Key Donors Required                   | Gavi, the Vaccine Alliance                               | X                                                        | X |
|                                       | Japan International Cooperation Agency                   | X                                                        |   |
|                                       | World Bank                                               |                                                          | X |
|                                       | UK Department for International Development (DFID)       |                                                          | X |
|                                       | US Agency for International Development (USAID)          |                                                          | X |
| Implementing Partners Required        | Churches Health Association of Zambia (CHAZ)             | X                                                        | X |
|                                       | World Health Organization                                | X                                                        | X |
|                                       | PATH and Better Immunization Data (BID) Initiative       | X                                                        | X |
|                                       | UN Children's Emergency Fund (UNICEF)                    | X                                                        | X |
|                                       | World Vision                                             | X                                                        |   |
|                                       | Catholic Relief Services                                 | X                                                        |   |
|                                       | ZAMRA                                                    |                                                          | X |
|                                       | John Snow International                                  |                                                          | X |
|                                       | Centre for Infectious Disease Research in Zambia (CIDRZ) |                                                          | X |
|                                       | Swedish International Dev't Cooperation Agency           |                                                          | X |
|                                       | United Nations Development Programme                     |                                                          | X |
|                                       | Centers for Disease Control and Prevention (CDC)         |                                                          | X |
|                                       | Experts Recommended                                      | Centre for Infectious Disease Research in Zambia (CIDRZ) | X |
| Zambia School of Nursing              |                                                          |                                                          | X |
| Chimana College                       |                                                          |                                                          | X |
| Medical University                    |                                                          |                                                          | X |
| Technical Advisory                    | Child Health TAG                                         | X                                                        |   |

|                            |                                                          |   |   |
|----------------------------|----------------------------------------------------------|---|---|
| Groups Recommended         | RMNCAH-N ICC                                             | X | X |
|                            | Centre for Infectious Disease Research in Zambia (CIDRZ) |   | X |
|                            | Churches Health Association of Zambia (CHAZ)             |   | X |
|                            | PATH                                                     |   | X |
|                            | Zambia School of Nursing                                 |   | X |
| Private Sector Recommended | John Snow International                                  |   | X |

235 \*Information sourced from Gavi joint appraisals and key informant interviews  
236

237 In 2018, the Zambian ICC membership filled all membership categories. The drastic change in  
238 ICC membership from 2014 to 2018, illustrated by the table below, demonstrates Zambian  
239 commitment to strengthening the ICC and improving collaboration for immunization  
240 programming. Although the membership of the ICC expanded significantly over the last decade,  
241 there are still apparent gaps, including limited private sector representation. Additionally, recent  
242 reports highlight concerns that some members were more of diplomats in their organizations and  
243 might be lacking the required technical capacity [7].

244  
245 The expansive membership of the ICC affected various components of vaccination  
246 programming, including cold chain expansion and data quality, through the inclusion of  
247 representatives from sub-committees. The Expanded Program on Immunization (EPI) in Senegal  
248 includes a technical working group, which functions separately from the ICC. The EPI technical  
249 working group (EPI-TWG) is divided into four subcommittees: 1) Monitoring and evaluation, 2)  
250 Social mobilization, 3) Cold chain and logistics, and 4) Service delivery. EPI-TWG  
251 subcommittees are known to be highly active and contributed substantially to the success of the  
252 Zambian ICC, especially through providing reports and evidence to both the ICC and ZITAG.  
253 [7] A representative for each sub-committee is represented on the ICC and attends quarterly

254 meetings for decision-making and resource mobilization. Additionally, integrated meetings,  
255 attended by ICC members and representatives from the national, provincial, and district levels,  
256 are conducted to review data and address gaps in coverage.

257

258 Membership of the ICC includes, as illustrated in Figure 4:

- 259 • External donors and implementing partners to align priorities and foster mutual trust.
- 260 • EPI officers, including representatives from all districts and sub-committees to present  
261 sector-specific updates and support context specific implementation.
- 262 • Select representatives from technical institutions, including researchers from the Centre  
263 for Infectious Disease Research in Zambia (CIDRZ), to ensure evidence is considered.

264

265 *“The ICC is used for [government officials] or partners who support programs in*  
266 *Zambia. It is a committee for high profile [officials], those who have interest in*  
267 *immunization. Together we tell them to [describe] the performance of the program and*  
268 *some of the challenges that it is facing, so that people can lobby for support in terms of*  
269 *finances and any other things that we have had tried from the program operation.” (EPI*  
270 *Cold Chain Officer)*

271

272 **Figure 4. Description of the ICC Structure in Zambia**

273

### 274 **3.1.2 Expanded mandate to other areas of health**

275 In 2017, the terms of reference for the Zambian ICC expanded to include a broader focus on  
276 Reproductive, Maternal, Neonatal, Child, and Adolescent Health, and Nutrition (RMNCAH-N).

277 This decision, discussed during an annual appraisal meeting with key stakeholders, stemmed

278 from a suggestion by Gavi to the Zambian ICC to expand its scope [5]. Following the appraisal  
279 meeting, the ICC mandate expanded to include organizations that work in child and maternal  
280 health. Key informants from the national and regional level spoke about the positive impact of  
281 this expanded mandate, which allows for efficient and comprehensive strategic planning and  
282 resource allocation.

283

284 *“In an effort to strengthen the governance and oversight capabilities of the ICC, there*  
285 *are recommendations to prioritize ICC strengthening in 2018 through an assessment*  
286 *which will include a comprehensive review of both the TORs and membership of the*  
287 *group.” (Gavi appraisal, 2017)*

288

289 *“The ICC is ideally targeted at the heads of organizations who have an interest in*  
290 *reproductive and maternal and child health and nutrition issues in the country.”*  
291 *(UNICEF personnel)*

292

293 Although Gavi appraisals stated that the Zambian ICC began to incorporate broader areas of  
294 health in 2017, there is evidence from interviews that the ICC was working to expand its scope to  
295 include maternal, new-born, and child health representation as early as 2010. This expansion  
296 allowed for a more holistic approach to vaccination, involving ante-natal clinics, traditional birth  
297 attendants, nurses, and other staff members from health facilities. Activities such as child growth  
298 tracking and school enrolment were also tied to vaccination efforts.

299

300           *“In terms of decision-making at a higher level, the ICC [has] evolved some time back.*  
301           *There was the RMNCAH-N partnership for maternal, newborn, and child health. It must*  
302           *have been 2010, there was a partnership which was created to incorporate the maternal*  
303           *component.” (WHO personnel)*

304

305 The ICC’s motivation to include RMNCAH-N was likely in response to prioritization of  
306 women’s, children’s, and adolescent health within the global health policy environment;  
307 however, this motivation was not entirely clear from our investigation. It is possible that  
308 introduction of the Human Papillomavirus (HPV) vaccine (piloted and scaled up in Zambia in  
309 2013 and 2019, respectively) may have supported this expansion. Representatives focused on  
310 HPV immunization were likely involved with the ICC at that time, establishing a natural  
311 connection between reproductive and vaccination programming, which highlights the importance  
312 of integrated programming and budgeting [17].

313

314 Although key informants interviewed for this study spoke positively about the expanded  
315 mandate and cross-sectoral approach, a recent Gavi evaluation revealed that members of the  
316 ZITAG and EPI-TWG had some concerns over the recent changes. [7] Namely, ZITAG  
317 members reported that the link between them and the Zambian ICC was weakened by the  
318 broadening mandate which led to inefficiencies within the immunization sector. [7] Some also  
319 described inefficiencies in decision-making related to vaccine programming due to the ICC’s  
320 broader focus. [7]

321

322 **3.2 Distinct and complementary roles of the Zambian ICC and ZITAG**



323 Our data illustrates that strengthening the relationship between the Zambian ICC and ZITAG for  
 324 long-term functionality supported improvements in vaccine programming. However, other recent  
 325 studies also highlight the challenges of coordinating between two similar national forums. [A]  
 326 The ZITAG was established in 2016 to provide evidence-based recommendations and as a  
 327 requirement to continue receiving Gavi funding. [7,8] To date, the ICC and ZITAG have distinct  
 328 and complementary roles and responsibilities, as described in Figure 5 and Table 3. Gavi-funded  
 329 programs typically focus first on the adoption of an ICC to manage donor funding, and later on  
 330 the establishment of the NITAG as a parallel technical group. Key informants from the MoH  
 331 described that the collaboration between the Zambian ICC and ZITAG allowed for long-term  
 332 functionality without duplication of efforts.

333

334 *Figure 5. Programming accomplished through collaboration of the ICC and NITAG in Zambia*

335

336 *Table 3: Comparing mandate and membership of ICCs and NITAGs*

|                   | <i>ICC</i>                                                                                                                                                                                                     | <i>NITAG</i>                                                                                                                                                                                                   |
|-------------------|----------------------------------------------------------------------------------------------------------------------------------------------------------------------------------------------------------------|----------------------------------------------------------------------------------------------------------------------------------------------------------------------------------------------------------------|
| <i>Mandate</i>    | Fosters collaboration between entities<br>Supports EPI resource mobilization<br>Supports advocacy efforts<br>Acts as a decision-making forum<br>Holds quarterly meetings<br>Lobbies for funding                | Collects and analyses data to provide the MoH and ICC with evidence-based advice<br>Holds an advisory role<br>Develops and supports grant proposals<br>Provides technical advice<br>Supports contextualization |
| <i>Membership</i> | MoH (chair)<br>Representatives from technical groups<br>Donors and implementing partners<br>Civil Society Organizations<br>EPI officers (including sub-committee members and district reps),<br>Private sector | Core members include: experts in public health, health care, epidemiology, vaccine sector, sociology, economics<br><br>Liaison: Technical partners (WHO, UNICEF)<br>Secretariat: Ensures NITAG is functioning  |

337

338 Through formal interactions, the ZITAG empowers the ICC to make evidence-based decisions.

339 The ZITAG presents evidence to the ICC either recommending or discouraging a particular

340 strategy or intervention based on context, formative research, piloting, and situational analysis.  
341 The MoH considers the evidence presented by the ZITAG when formulating national  
342 immunization policies and strategies. Integration of both bodies within national decision-making  
343 is enhanced by the distinct roles of each entity, a component that is necessary for the success of  
344 advisory and coordination committees [1,6]. Despite its recent establishment, Zambian officials  
345 interviewed for this study value the ZITAG's ability to provide context-specific  
346 recommendations for immunization programming [14].

347

348 *“In terms of professional bodies in health, we have a good number of them that attend*  
349 *[regular coordination] meetings; also, we have the NITAG that has people pulled from*  
350 *different professions. So that's quite a key component in the governance system.” (EPI*  
351 *personnel)*

352

353 Additionally, the ZITAG includes several technical stakeholders, such as academics,  
354 epidemiologists, health care professionals, scientific societies, and technical experts from NGOs,  
355 whereas ICC membership includes a broader range of leadership.[14] Key informants in Zambia  
356 agreed that delays from coordination between the ICC and ZITAG are offset by the benefits of  
357 more robust, evidence-based decisions that are tailored to local context, which aligns with  
358 findings from existing literature.[7] In some cases, members of the ZITAG and EPI-TWG report  
359 questioning the efficiency and transparency of the ICC, which suggests that even further  
360 improvements in coordination and communication between these entities may be needed.

361

362 The addition of a fully functioning ZITAG, alongside the decision-making authority of the ICC,  
363 supports strategic planning and advocacy for funding:

364

365 *“The ZITAG is looking at [immunization] from a very critical standpoint, and from a*  
366 *very technical standpoint – looking at costs, disease burden, etc. I think [the ZITAG is]*  
367 *an external body that’s incredibly important to give recommendations compared to the*  
368 *ICC which [does not always include] many technical partners.” (CIDRZ personnel)*

369

370

### 371 **3.3 How does the Zambian ICC compare with the ICCs of other countries in Africa?**

372 There is limited information available comparing the functionality of ICCs in different countries  
373 or assessing the interplay between ICCs and NITAGs. From our literature review, we found that  
374 Kenya and Tanzania, both with DTP3 coverage comparable to that of Zambia, have also  
375 experienced the benefits of expanding their ICC membership [18-22]. The Kenyan ICC also  
376 utilizes a multisectoral approach, which includes alignment of priorities with other health sectors,  
377 for crafting immunization policy through cooperation with the KENITAG. The ICC of Tanzania  
378 schedules additional meetings with its NITAG for strategizing efforts to reduce bottlenecks in  
379 delivery and improve uptake of immunization services [22]. While all countries receiving Gavi  
380 funding are advised to establish an ICC and NITAG, only some have reported fully utilizing  
381 collaboration of the two bodies for decision-making [19,23]. With active, inclusive, and  
382 collaborative ICCs and NITAGs, Zambia, Kenya, and Tanzania utilized these forums through  
383 defining clear roles and prioritizing the efficacy of immunization programs.

384

### 385 **3.4 Transferable lessons**

386 The structure and role of the Zambian ICC may act as a model for other countries by adapting  
387 based on the following transferable lessons:

388

- 389 • Expand ICC membership to include a variety of government officials, local  
390 representatives, community organizations, external partners, and donors to foster  
391 coordination and collaboration across stakeholders.
- 392 • Expand ICC mandate and scope to include other areas of health (i.e., reproductive,  
393 maternal, and child health) in order to foster integration of programs and health systems  
394 strengthening while still prioritizing immunization.
- 395 • Establish distinct and complementary roles for the ICC and NITAG to ensure efficient,  
396 collaborative, and sustainable integration. Continuously revisit the need for additional  
397 communication between groups.

398

### 399 **4. Limitations**

400

401 This study has several limitations. First, we focused on Zambia as a positive deviant in vaccine  
402 exemplars but were unable to carry out a similar analysis in a non-exemplary country to compare  
403 immunization coverage. Second, the research tools focused on the factors that drove catalytic  
404 change and did not probe on interventions or policies that were unsuccessful. Third, using  
405 qualitative methods to understand historical events was challenging; interviewees often spoke  
406 about current experiences rather than discussing historical factors. However, research assistants  
407 probed respondents to reflect on longitudinal changes in the immunization program.

408

409 **5. Conclusion**

410 Zambia’s status as an exemplar in vaccine delivery was likely supported by the strength,  
411 expansion, and prioritization of its national coordination and technical advisory committees.  
412 While most countries have functional ICCs, the Zambian ICC demonstrated enhanced strategic  
413 planning, decision-making, and lobbying efforts regarding vaccine programming. More research  
414 is needed to explore ICC functionality, compare ICCs from different countries, explore costs  
415 related to ICC activities, and assess the integral relationship between the ICC and NITAG.  
416 Findings from this paper may contribute to the decision-making processes, long-term  
417 engagement, membership, and mandates for ICCs in other countries.

418

419 **Figures in this manuscript include:**

420 Figure 1. DTP1 coverage in Zambia 2000-2018

421 Figure 2. DTP3 coverage in Zambia 2000-2018

422 Figure 3. Heat map illustrating improved DTP3 coverage across all regions of Zambia 2000-2019

423 Figure 4. Description of the ICC structure in Zambia

424 Figure 5. Programming accomplished through collaboration of the ICC and NITAG in Zambia

425

426 **Conflict of interest statement**

427 All authors declare: 1) No support from any organisation for the submitted work; 2) no financial  
428 relationships with any organisations that might have an interest in the submitted work in the  
429 previous three years; 3) no other relationships or activities that could appear to have influenced  
430 the submitted work.

431

432 **Contributors**

433 KR, BD, WK, RB contributed to data collection; ZS, KR, KH, RD, BD, AE, KRI, SR, WO, WK,  
434 RB, MF contributed to analysis/interpretation; ZS, KR, KH, RD drafted the article; All authors  
435 critically revised the article. All authors provided approval of the submitted version. The views  
436 expressed are those of the authors alone and do not necessarily reflect the policies or  
437 recommendations of the institutions with whom they are affiliated.

438

439 **Declaration of interests**

440 Authors declare no competing interests.

441

442 **Acknowledgments**

443 We thank the Center for Family Health Research in Zambia for their partnership in this study. In  
444 addition, we thank Sarah Chesemore, Anna Rapp, Tove Ryan, and Ethan Wong from the Bill and  
445 Melinda Gates Foundation; Kate Buellesbach, Nathaniel Gerthe, Gloria Ikilezi, Caitlyn Mason,  
446 David Phillips, and Oliver Rothschild from Gates Ventures; and the Vaccine Exemplars  
447 Research Advisory Group for their insights, specifically Agnes Binagwaho, Laura Crow,  
448 Carolina Danovaro, Anuradha Gupta, Heidi Larson, Penelope Masumbu, Kate O'Brien, Helen  
449 Rees, Lora Shimp, and Aaron Wallace. We gratefully acknowledge the participants who gave  
450 their time and insights to help us better understand Zambia's vaccine delivery system.

451

452 **Funding statement**

453 This work was supported by the Bill & Melinda Gates Foundation, grant number OPP1195041.  
454 Pilot and proposal development funds were provided by Gates Ventures.

455

456 **Data statement**

457 The data are not publicly available as all data are confidential.

458 **References:**

- 459
- 460 1. Duclos P. National Immunization Technical Advisory Groups (NITAGs): Guidance for their  
461 establishment and strengthening. *Vaccine*. 2010; **28**:A18–A25.
- 462
- 463 2. Okeibunor J, Nsubuga P, Salla M, *et al*. Coordination as a best practice from the polio  
464 eradication initiative: Experiences from five member states in the African region of the  
465 World Health Organization. *Vaccine*. 2016; **34**:5203–7.
- 466
- 467 3. Grundy J. Country-level governance of global health initiatives: an evaluation of  
468 immunization coordination mechanisms in five countries of Asia. *Health Policy Plan*.  
469 2009; **25**:186–96.
- 470
- 471 4. Gandhi G. Charting the evolution of approaches employed by the Global Alliance for  
472 Vaccines and Immunizations (GAVI) to address inequities in access to immunization: a  
473 systematic qualitative review of GAVI policies, strategies and resource allocation  
474 mechanisms through an equity lens (1999–2014). *BMC Public Health*. 2015; **15**.  
475 DOI:10.1186/s12889-015-2521-8.
- 476
- 477 5. Gavi, the Vaccine Alliance. Zambia Documents. [https://www.Gavi.org/country-  
479 documents/zambia](https://www.Gavi.org/country-<br/>478 documents/zambia).
- 480
- 481 6. Howard N, Walls H, Bell S, *et al*. The role of National Immunisation Technical Advisory  
482 Groups (NITAGs) in strengthening national vaccine decision-making: A comparative  
483 case study of Armenia, Ghana, Indonesia, Nigeria, Senegal and Uganda. *Vaccine*. 2018;  
484 **36**:5536–43.
- 485
- 486 7. Simuyemba MC, Chama-Chiliba C, Chompola A, Sinyangwe A, Bchir A, Asimwe G, Masiye  
487 F. Evaluating the functionality and effectiveness of ZITAG and related expanded  
488 programme on immunisation technical committees in Zambia. *Vaccine X*. 2022 Jul  
489 29;12:100193. doi: 10.1016/j.jvacx.2022.100193. PMID: 35942059; PMCID:  
490 PMC9356109.
- 491
- 492 8. Gavi, the Vaccine Alliance. Evaluation of the Zambia Immunisation Programme – Assessing  
493 Prospects for Sustainable Immunisation Financing. 2019.
- 494
- 495 9. Howard N, Bell S, Walls H, *et al*. The need for sustainability and alignment of future support  
496 for National Immunization Technical Advisory Groups (NITAGs) in low and middle-  
497 income countries. *Human Vaccines Immunotherapeutics*. 2018; **14**:1539–41.
- 498
- 499 10. Buffardi AL, Archer RA, Sharp S. Regional bodies supporting national-level evidence-  
500 informed decision-making on vaccines. Overseas Development Institute. 2020; published  
501 online Jan. [https://cdn.odi.org/media/documents/odi-pa-regionalbodieseidm-briefingnote-  
502 feb20.pdf](https://cdn.odi.org/media/documents/odi-pa-regionalbodieseidm-briefingnote-<br/>502 feb20.pdf).



- 503 11. Micek K, Hester KA, Chanda C, Darwar R, Dounebaine B, Ellis AS, et al. Critical success  
504 factors for routine immunization performance: A case study of zambia 2000 to 2018.  
505 *Vaccine*: X. 2022; 11:100166. doi:10.1016/j.jvacx.2022.100166
- 506 12. Bednarczyk RA, Hester KA, Dixit SM, Ellis AS, Escoffery C, Kilembe W, et al. Protocol:  
507 Identification and evaluation of critical factors in achieving high and sustained childhood  
508 immunization coverage in selected low- and lower-middle income countries. *BMJ Open*.  
509 2021; 12(4). doi:10.1101/2021.12.01.21267018
- 510 13. Hester KA. Exemplars in vaccine delivery. Center For Open Science; 2022.  
511 <https://osf.io/7ys4a/>
- 512 14. Adjagba A, Senouci K, Biellik R, *et al.* Supporting countries in establishing and  
513 strengthening NITAGs: Lessons learned from 5 years of the SIVAC initiative. *Vaccine*.  
514 2015; **33**:588–95.  
515
- 516 15. Gavi, the Vaccine Alliance. National coordination forums self-assessment tool.  
517 [https://www.gavi.org/news/document-library/national-coordination-forums-self-  
519 assessment-tool](https://www.gavi.org/news/document-library/national-coordination-forums-self-<br/>518 assessment-tool).
- 520 16. Gavi, the Vaccine Alliance. Guidance on national coordination forums.  
521 <https://www.gavi.org/news/document-library/guidance-national-coordination-forums>.  
522
- 523 17. Pollack AE, Balkin M, Edouard L, *et al.* Ensuring access to HPV vaccines through integrated  
524 services: a reproductive health perspective. *Bulletin of the World Health Organization*.  
525 2007; **85**:57–63.  
526
- 527 18. World Health Organization. Diphtheria tetanus toxoid and pertussis (DTP3) - Immunization  
528 coverage estimates by country. <https://apps.who.int/gho/data/node.main.A827> (accessed  
529 April 1, 2021).  
530
- 531 19. Gavi, the Vaccine Alliance. Joint Appraisal Report - Kenya. 2017.  
532 <https://www.gavi.org/sites/default/files/document/joint-appraisal-kenya-2017pdf.pdf>.  
533
- 534 20. Gavi, the Vaccine Alliance. Joint Appraisal Report - Kenya. 2019.  
535 [https://www.gavi.org/sites/default/files/document/2020/Kenya%20Joint%20Appraisal%20  
536 2019%20Final.pdf](https://www.gavi.org/sites/default/files/document/2020/Kenya%20Joint%20Appraisal%202019%20Final.pdf).  
537
- 538 21. Gavi, the Vaccine Alliance. Joint Appraisal Report - Tanzania. 2019.  
539 [https://www.gavi.org/sites/default/files/document/2020/Tanzania%20Joint%20Appraisal  
540 %202019.pdf](https://www.gavi.org/sites/default/files/document/2020/Tanzania%20Joint%20Appraisal%202019.pdf).  
541
- 542 22. Gavi, the Vaccine Alliance. Tanzania - 2018 programme support rationale: strategic period  
543 (2019-2023). 2018. [https://www.gavi.org/sites/default/files/document/programme-  
545 support-rationale---hss-2019---tanzaniapdf.pdf](https://www.gavi.org/sites/default/files/document/programme-<br/>544 support-rationale---hss-2019---tanzaniapdf.pdf).

546 23. NITAG Resource Center. Global NITAG Network Members. 2019. [https://www.nitag-](https://www.nitag-resource.org/network/members)  
547 [resource.org/network/members](https://www.nitag-resource.org/network/members).

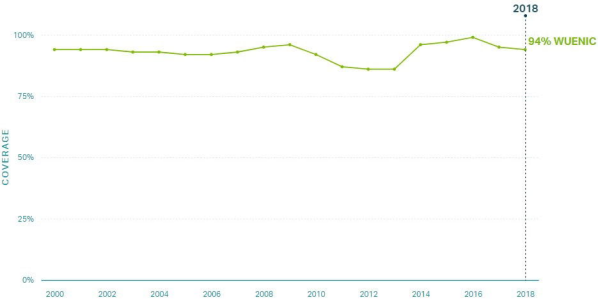

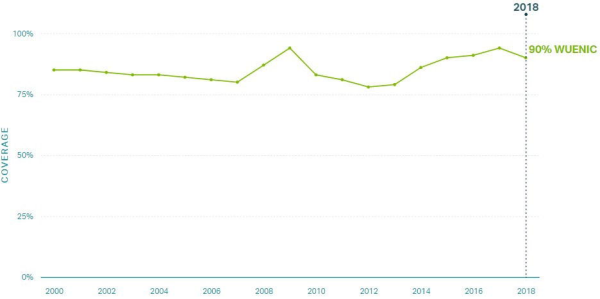

# ZAMBIA IMPROVED DTP3 COVERAGE THROUGHOUT ALL REGIONS

## DTP3 COVERAGE IN ZAMBIA, 2000 - 2019

2000

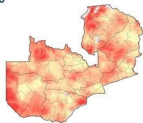

2005

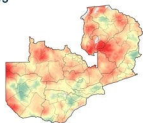

2010

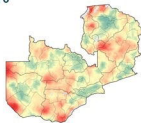

2015

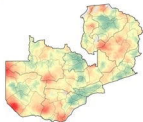

2019

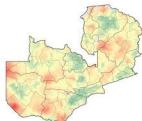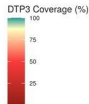

Zambia improved DTP3 coverage throughout all regions, although progress varied by region

Sources: IHME GBD 2019 (DTP3 Coverage)

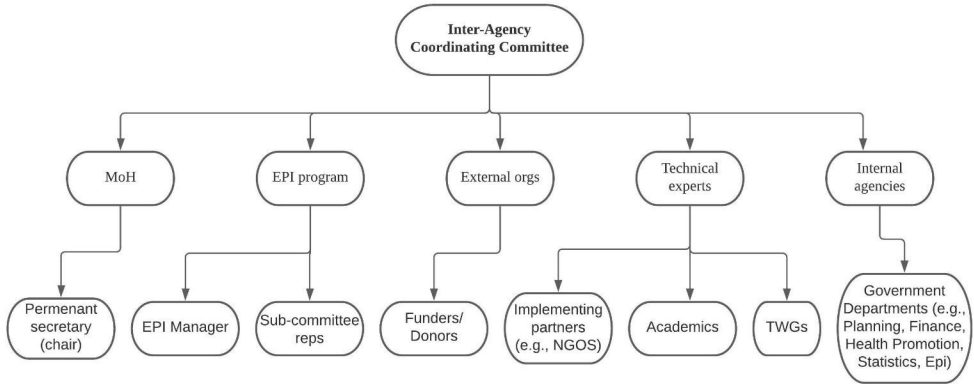

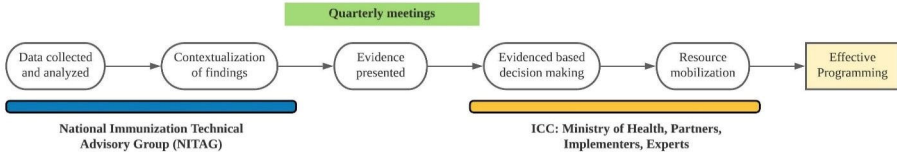

Source: https://www.medrxiv.org/content/medrxiv/early/2023/08/30/2021.11.29.21267021.full.pdf
